# Supplementary material for: Ecology of Gamebirds in Namha National Protected Area, Lao People’s Democratic Republic
Source: MDPI journal article supplement (doi:10.3390/birds2040033), 2021-12-08
Supplement: s1 [file s1]

**Supplementary File S4:** Supplementary Figures and Tables for Bleisch, W.V.; Buzzard, P.; Souliya, D.; Li X.; Brooks, D.M. Ecology of Gamebirds in Namha National Protected Area, Lao People's Democratic Republic. *Birds* 2021, 2,

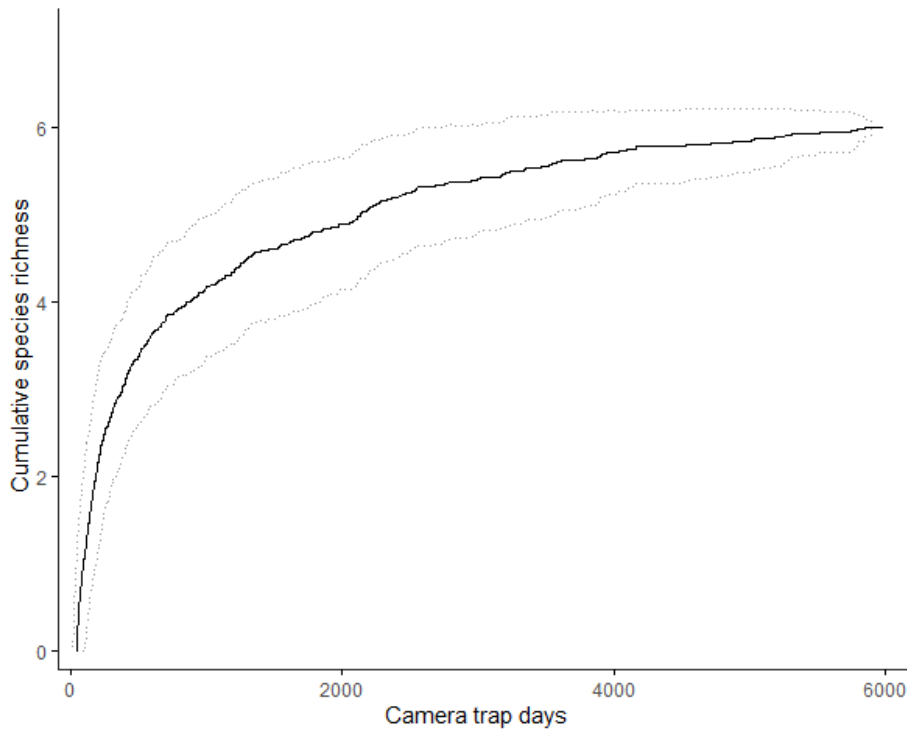

**Figure S1. Accumulation of gamebird species richness with trapping effort.** Species accumulation curve for the community of gamebirds detected at 63 camera trapping stations in the Namha National Protected Area. Plot was generated by repeat sampling such that the order of detection of species was randomized 1000 times and results used to derive the 95% confidence intervals of the mean (Rovero et al. 2014).

**Table S1.** Thirty-one species recorded from 63 camera traps (April 2013 - June 2015 and May 2017 - September 2018) in Namha NPA, Luang Namtha Province, Lao PDR.

| Common name                        | Latin name                       | # events |
|------------------------------------|----------------------------------|----------|
| <b>GameBirds</b>                   | <b>Phasianidae</b>               |          |
| Rufous-throated Partridge          | <i>Arborophila rufogularis</i>   | 1        |
| Bar-backed Partridge               | <i>Arborophila brunneopectus</i> | 5        |
| Scaly-breasted Partridge           | <i>Arborophila chloropus</i>     | 4        |
| Red Junglefowl                     | <i>Gallus gallus</i>             | 21       |
| Silver Pheasant                    | <i>Lophura nycthemera</i>        | 84       |
| Gray Peacock Pheasant              | <i>Polyplectron bicalcaratum</i> | 44       |
| <b>Kingfishers</b>                 | <b>Alcedinidae</b>               |          |
| Ruddy Kingfisher                   | <i>Halcyon coromanda</i>         | 1        |
| <b>Bee-eaters</b>                  | <b>Meropidae</b>                 |          |
| Blue-bearded Bee-eater             | <i>Nyctornis athertoni</i>       | 1        |
| <b>Owls</b>                        | <b>Strigidae</b>                 |          |
| Brown Fish Owl                     | <i>Ketupa zeylonensis</i>        | 17       |
| <b>Doves</b>                       | <b>Columbidae</b>                |          |
| Emerald Dove                       | <i>Chalcophaps indica</i>        | 67       |
| <b>Pittas</b>                      | <b>Pittidae</b>                  |          |
| Rusty-naped Pitta                  | <i>Hydrornis oatesi</i>          | 1        |
| <b>Broadbills</b>                  | <b>Eurylaimidae</b>              |          |
| Silver-breasted Broadbill          | <i>Serilophus lunatus</i>        | 6        |
| <b>Magpies and Allies</b>          | <b>Corvidae</b>                  |          |
| Common Green Magpie                | <i>Cissa chinensis</i>           | 1        |
| <b>Monarch flycatchers</b>         | <b>Monarchidae</b>               |          |
| Black-naped Monarch                | <i>Hypothymis azurea</i>         | 5        |
| Japanese Paradise-flycatcher       | <i>Terpsiphone atrocaudata</i>   | 1        |
| <b>Woodshrikes and Allies</b>      | <b>Vangidae</b>                  |          |
| Large Woodshrike                   | <i>Tephrodornis virgatus</i>     | 1        |
| <b>Thrushes</b>                    | <b>Turdidae</b>                  |          |
| White's Thrush                     | <i>Zootheria aurea</i>           | 1        |
| <b>Old world flycatchers</b>       | <b>Musciacapidae</b>             |          |
| Blue Whistling Thrush              | <i>Myophonus caeruleus</i>       | 1        |
| Rufous-bellied Niltava             | <i>Niltava sundava</i>           | 1        |
| White-tailed Robin                 | <i>Myiomela cambodiana</i>       | 2        |
| White-rumped Shama                 | <i>Copsychus malabaricus</i>     | 6        |
| <b>Bulbuls</b>                     | <b>Pycnonotidae</b>              |          |
| Puff-throated Bulbul               | <i>Alophoixus pallidus</i>       | 6        |
| <b>Old world warblers</b>          | <b>Phylloscopidae</b>            |          |
| Dusky Warbler                      | <i>Phylloscopus fuscatus</i>     | 1        |
| <b>Laughingthrushes and Allies</b> | <b>Leiothrichidae</b>            |          |
| White-crested Laughingthrush       | <i>Garrulax leucolophus</i>      | 7        |
| Greater necklaced Laughingthrush   | <i>Ianthocincla pectoralis</i>   | 2        |

| <b>Babblers</b>             | <b>Timaliidae</b>                |   |
|-----------------------------|----------------------------------|---|
| Red-billed Scimitar Babbler | <i>Pomatorhinus ochraceiceps</i> | 2 |
| Rufous-fronted Babbler      | <i>Cyanoderma rufifrons</i>      | 2 |
| Rufous-capped Babbler       | <i>Cyanoderma ruficeps</i>       | 2 |
| Chestnut-capped Babbler     | <i>Timalia pileata</i>           | 1 |
| Spot-necked Babbler         | <i>Stachyris strialata</i>       | 2 |
| Grey-throated Babbler       | <i>Stachyris nigriceps</i>       | 1 |

**Table S2.** Availability ( $\lambda$ ) and individual detectability ( $r$ ) for three species of pheasants from 48 camera trap stations set in the Namha National Protected Area.

Mean of means, SD, Times Series Standard Error, Median, 95% Bayesian credible interval (BCI) and 95% Highest Probability Density Interval (HPDI) as estimated by a Royle Nichols hierarchical model of availability and detectability with 8 coefficients of association (see Methods, Supplementary A and Table S4 for details).

|                                                                                            |               |       |                |        | BCI   |         | 95% HPDI   |            |
|--------------------------------------------------------------------------------------------|---------------|-------|----------------|--------|-------|---------|------------|------------|
| Species                                                                                    | Mean of means | SD    | Time-series SE | Median | 2.50% | 97.50 % | HPDI lower | HPDI upper |
| Availability of individuals or groups, $\lambda$                                           |               |       |                |        |       |         |            |            |
| <i>Gallus gallus</i>                                                                       | 13.04         | 42.57 | 8.96           | 1.14   | 0.20  | 159.31  | 0.07       | 73.73      |
| <i>Lophura nycthemera</i>                                                                  | 2.03          | 5.79  | 0.50           | 1.25   | 0.54  | 5.73    | 0.38       | 3.73       |
| <i>Polyplectron bicalcaratum</i>                                                           | 5.99          | 29.54 | 5.35           | 0.60   | 0.13  | 54.54   | 0.04       | 13.31      |
| Probability of detection of each available individual or group in each 7 day occasion, $r$ |               |       |                |        |       |         |            |            |
| <i>Gallus gallus</i>                                                                       | 3.91%         | 4.15% | 0.16%          | 2.57%  | 0.02% | 14.35 % | 0.00%      | 12.00%     |
| <i>Lophura nycthemera</i>                                                                  | 6.48%         | 2.90% | 0.07%          | 6.24%  | 1.40% | 12.94 % | 0.88%      | 12.30%     |
| <i>Polyplectron bicalcaratum</i>                                                           | 7.68%         | 5.99% | 0.19%          | 6.47%  | 0.25% | 22.47 % | 0.05%      | 19.22%     |

**Table S3.** Species specific beta coefficients of association of availability ( $\beta$ ) and individual detectability ( $\gamma$ ) for three species of pheasants from a model considering 11 environmental covariates for 48 camera trap stations in the Namha National Protected Area. Means of coefficients of association ( $\widehat{\beta}_{ij}$  and  $\widehat{\gamma}_{ij}$ ), SD, Times Series Standard Error, 95% Bayesian Credible Interval (BCI), 95% Highest Probability Density Interval (HPDI) and Bayesian posterior predicted probability (Bppp) of absolute value greater than 0.0 from a Royle Nichols hierarchical model of availability and detectability. \* indicates Bayesian posterior predicted  $P < 0.05$  that coefficient is less than or greater than 0. \*\* indicates 95% HPDI interval does not include 0. See Methods and Supplementary A for details.

|                                                                            |               |        |       | Time-series |        | BCI    |        | 95% HPDI   |            |            |       |    |
|----------------------------------------------------------------------------|---------------|--------|-------|-------------|--------|--------|--------|------------|------------|------------|-------|----|
| Species                                                                    | Covariate     | Mean   | SD    | SE          | Median | 2.50%  | 97.50% | HPDI lower | HPDI upper | PPP of > 0 | Bppp  |    |
| Posterior predicted $\beta$ coefficients for association with availability |               |        |       |             |        |        |        |            |            |            |       |    |
| <i>Gallus gallus</i>                                                       | is_2ndsession | 0.604  | 1.054 | 0.048       | 0.477  | -1.268 | 2.956  | -1.394     | 2.812      | 0.719      | 0.281 |    |
| <i>Lophura nycthemera</i>                                                  | is_2ndsession | -0.076 | 0.790 | 0.021       | -0.026 | -1.802 | 1.345  | -1.704     | 1.400      | 0.483      | 0.483 |    |
| <i>Polyplectron bicalcaratum</i>                                           | is_2ndsession | 0.114  | 1.246 | 0.027       | 0.111  | -2.546 | 2.787  | -2.216     | 3.055      | 0.554      | 0.446 |    |
| <i>Gallus gallus</i>                                                       | Logit cover   | -0.170 | 0.462 | 0.017       | -0.128 | -1.156 | 0.647  | -1.089     | 0.708      | 0.383      | 0.383 |    |
| <i>Lophura nycthemera</i>                                                  | Logit cover   | 0.310  | 0.303 | 0.004       | 0.287  | -0.237 | 0.953  | -0.250     | 0.928      | 0.851      | 0.149 |    |
| <i>Polyplectron bicalcaratum</i>                                           | Logit cover   | 0.374  | 0.662 | 0.015       | 0.265  | -0.690 | 2.046  | -0.851     | 1.737      | 0.724      | 0.276 |    |
| <i>Gallus gallus</i>                                                       | Km to village | -0.132 | 0.479 | 0.013       | -0.090 | -1.179 | 0.685  | -1.093     | 0.741      | 0.427      | 0.427 |    |
| <i>Lophura nycthemera</i>                                                  | Km to village | 0.571  | 0.287 | 0.004       | 0.568  | 0.007  | 1.143  | 0.006      | 1.139      | 0.976      | 0.024 | ** |
| <i>Polyplectron bicalcaratum</i>                                           | Km to village | 0.441  | 0.470 | 0.013       | 0.423  | -0.470 | 1.432  | -0.422     | 1.465      | 0.839      | 0.161 |    |
| <i>Gallus gallus</i>                                                       | Altitude      | -0.711 | 0.651 | 0.022       | -0.604 | -2.183 | 0.306  | -2.070     | 0.384      | 0.103      | 0.103 |    |
| <i>Lophura nycthemera</i>                                                  | Altitude      | -0.188 | 0.281 | 0.004       | -0.188 | -0.734 | 0.366  | -0.746     | 0.352      | 0.250      | 0.250 |    |

|                                                                              |               |        |       |       |        |        |        |        |       |       |       |    |
|------------------------------------------------------------------------------|---------------|--------|-------|-------|--------|--------|--------|--------|-------|-------|-------|----|
| <i>Polyplectron bicalcaratum</i>                                             | Altitude      | 0.016  | 0.758 | 0.013 | -0.078 | -1.292 | 1.857  | -1.415 | 1.704 | 0.444 | 0.444 |    |
| <i>Gallus gallus</i>                                                         | altitude.sqrd | -0.381 | 0.730 | 0.023 | -0.328 | -1.981 | 0.950  | -1.837 | 1.058 | 0.306 | 0.306 |    |
| <i>Lophura nycthemera</i>                                                    | altitude.sqrd | 0.266  | 0.274 | 0.003 | 0.267  | -0.281 | 0.797  | -0.282 | 0.797 | 0.837 | 0.163 |    |
| <i>Polyplectron bicalcaratum</i>                                             | altitude.sqrd | -3.531 | 2.411 | 0.064 | -3.119 | -9.603 | -0.109 | -8.309 | 0.260 | 0.016 | 0.016 | *  |
| <i>Gallus gallus</i>                                                         | Log roughness | -0.399 | 0.542 | 0.024 | -0.385 | -1.513 | 0.617  | -1.392 | 0.731 | 0.222 | 0.222 |    |
| <i>Lophura nycthemera</i>                                                    | Log roughness | 0.623  | 0.280 | 0.003 | 0.621  | 0.084  | 1.180  | 0.069  | 1.161 | 0.987 | 0.013 | ** |
| <i>Polyplectron bicalcaratum</i>                                             | Log roughness | 1.917  | 0.893 | 0.030 | 1.808  | 0.476  | 4.018  | 0.314  | 3.710 | 0.998 | 0.002 | ** |
| <i>Gallus gallus</i>                                                         | dryseason     | 0.374  | 0.490 | 0.018 | 0.312  | -0.430 | 1.471  | -0.486 | 1.374 | 0.782 | 0.218 |    |
| <i>Lophura nycthemera</i>                                                    | dryseason     | -0.063 | 0.279 | 0.004 | -0.057 | -0.624 | 0.472  | -0.616 | 0.478 | 0.420 | 0.420 |    |
| <i>Polyplectron bicalcaratum</i>                                             | dryseason     | -0.207 | 0.560 | 0.015 | -0.132 | -1.514 | 0.743  | -1.476 | 0.774 | 0.381 | 0.381 |    |
| <i>Gallus gallus</i>                                                         | rainseason    | 0.275  | 0.398 | 0.010 | 0.268  | -0.491 | 1.117  | -0.534 | 1.061 | 0.771 | 0.229 |    |
| <i>Lophura nycthemera</i>                                                    | rainseason    | 0.267  | 0.267 | 0.003 | 0.266  | -0.248 | 0.799  | -0.272 | 0.771 | 0.845 | 0.155 |    |
| <i>Polyplectron bicalcaratum</i>                                             | rainseason    | 0.416  | 0.402 | 0.009 | 0.382  | -0.292 | 1.329  | -0.345 | 1.259 | 0.872 | 0.128 |    |
| <i>Gallus gallus</i>                                                         | Log tourism   | 2.425  | 2.046 | 0.163 | 1.849  | 0.154  | 8.535  | -0.229 | 6.681 | 0.989 | 0.011 | *  |
| <i>Lophura nycthemera</i>                                                    | Log tourism   | 0.249  | 0.346 | 0.004 | 0.228  | -0.384 | 0.970  | -0.428 | 0.923 | 0.756 | 0.244 |    |
| <i>Polyplectron bicalcaratum</i>                                             | Log tourism   | 1.026  | 0.795 | 0.029 | 0.936  | -0.306 | 2.851  | -0.405 | 2.670 | 0.924 | 0.076 |    |
| Posterior predicted $\gamma$ coefficients for association with detectability |               |        |       |       |        |        |        |        |       |       |       |    |

|                                  |              |        |       |       |        |        |       |        |       |       |       |  |
|----------------------------------|--------------|--------|-------|-------|--------|--------|-------|--------|-------|-------|-------|--|
| <i>Gallus gallus</i>             | is_Aggressor | -0.089 | 1.043 | 0.037 | -0.023 | -2.364 | 1.867 | -2.229 | 1.950 | 0.488 | 0.488 |  |
| <i>Lophura nycthemera</i>        | is_Aggressor | 1.179  | 0.985 | 0.023 | 1.099  | -0.505 | 3.312 | -0.620 | 3.165 | 0.899 | 0.101 |  |
| <i>Polyplectron bicalcaratum</i> | is_Aggressor | -0.631 | 1.629 | 0.027 | -0.386 | -4.426 | 2.133 | -4.111 | 2.334 | 0.379 | 0.379 |  |
| <i>Gallus gallus</i>             | is_WideAngle | 0.229  | 0.694 | 0.014 | 0.197  | -1.115 | 1.724 | -1.115 | 1.726 | 0.635 | 0.365 |  |
| <i>Lophura nycthemera</i>        | is_WideAngle | 0.002  | 0.458 | 0.005 | 0.011  | -0.927 | 0.902 | -0.942 | 0.877 | 0.510 | 0.490 |  |
| <i>Polyplectron bicalcaratum</i> | is_WideAngle | 0.350  | 0.889 | 0.017 | 0.262  | -1.258 | 2.386 | -1.278 | 2.352 | 0.658 | 0.342 |  |
| <i>Gallus gallus</i>             | Ndvi         | 0.169  | 0.597 | 0.012 | 0.188  | -1.111 | 1.344 | -1.120 | 1.335 | 0.653 | 0.347 |  |
| <i>Lophura nycthemera</i>        | Ndvi         | 0.242  | 0.306 | 0.004 | 0.241  | -0.348 | 0.855 | -0.361 | 0.836 | 0.787 | 0.213 |  |
| <i>Polyplectron bicalcaratum</i> | Ndvi         | 0.746  | 0.825 | 0.012 | 0.574  | -0.433 | 2.778 | -0.566 | 2.569 | 0.859 | 0.141 |  |
| <i>Gallus gallus</i>             | Northness    | 0.091  | 0.508 | 0.008 | 0.046  | -0.782 | 1.214 | -0.823 | 1.148 | 0.553 | 0.447 |  |
| <i>Lophura nycthemera</i>        | Northness    | -0.066 | 0.251 | 0.003 | -0.059 | -0.562 | 0.420 | -0.555 | 0.425 | 0.402 | 0.402 |  |
| <i>Polyplectron bicalcaratum</i> | Northness    | 0.157  | 0.490 | 0.007 | 0.105  | -0.729 | 1.278 | -0.746 | 1.246 | 0.615 | 0.385 |  |
| <i>Gallus gallus</i>             | Eastness     | -0.096 | 0.660 | 0.016 | -0.041 | -1.507 | 1.076 | -1.442 | 1.117 | 0.470 | 0.470 |  |
| <i>Lophura nycthemera</i>        | Eastness     | 0.173  | 0.462 | 0.006 | 0.161  | -0.723 | 1.128 | -0.730 | 1.117 | 0.647 | 0.353 |  |
| <i>Polyplectron bicalcaratum</i> | Eastness     | 0.696  | 0.962 | 0.015 | 0.524  | -0.734 | 2.968 | -0.863 | 2.797 | 0.797 | 0.203 |  |

Notes:

**Table S4:** Species specific beta coefficients of association of availability ( $\beta$ ) and individual detectability ( $\gamma$ ) for three species of pheasants from a model considering 6 environmental covariates for 48 camera trap stations in the Namha National Protected Area.

Means of coefficients of association ( $\widehat{\beta}_{ij}$  and  $\widehat{\gamma}_{ij}$ ), SD, Times Series Standard Error, 95% Bayesian Credible Interval (BCI), 95% Highest Probability Density Interval (HPDI) and Bayesian posterior predicted probability (Bppp) of greater or less than 0.0 from a Royle Nichols Hierarchical model of availability and detectability. Eight covariates were included in the model. \* indicates significant at aggregate  $p < 0.05$  by the Holm-Bonferonni correction for multiple tests. See Methods and Supplementary A for detailed methods and R code.

|                                                                            |               |        |       |                |        | BCI     |        | 95% HPDI   |            |            |       |   |
|----------------------------------------------------------------------------|---------------|--------|-------|----------------|--------|---------|--------|------------|------------|------------|-------|---|
| Species                                                                    | Covariate     | Mean   | SD    | Time-series SE | Median | 2.50%   | 97.50% | HPDI lower | HPDI upper | PPP of > 0 | Bppp  |   |
| Posterior predicted $\beta$ coefficients for association with availability |               |        |       |                |        |         |        |            |            |            |       |   |
| <i>Gallus gallus</i>                                                       | Km village    | -0.153 | 0.404 | 0.010          | -0.122 | -1.033  | 0.539  | -0.930     | 0.636      | 0.383      | 0.383 |   |
| <i>Lophura nycthemera</i>                                                  | Km village    | 0.474  | 0.249 | 0.003          | 0.473  | -0.015  | 0.960  | -0.016     | 0.958      | 0.971      | 0.029 | * |
| <i>Polyplectron bicalcaratum</i>                                           | Km village    | 0.423  | 0.439 | 0.009          | 0.397  | -0.408  | 1.374  | -0.418     | 1.345      | 0.854      | 0.146 |   |
| <i>Gallus gallus</i>                                                       | Altitude      | -0.733 | 0.669 | 0.022          | -0.629 | -2.377  | 0.224  | -2.063     | 0.356      | 0.088      | 0.088 |   |
| <i>Lophura nycthemera</i>                                                  | Altitude      | -0.179 | 0.263 | 0.003          | -0.180 | -0.701  | 0.347  | -0.708     | 0.337      | 0.238      | 0.238 |   |
| <i>Polyplectron bicalcaratum</i>                                           | Altitude      | -0.037 | 0.708 | 0.012          | -0.107 | -1.289  | 1.623  | -1.428     | 1.470      | 0.415      | 0.415 |   |
| <i>Gallus gallus</i>                                                       | altitude.sqrd | -0.139 | 0.723 | 0.034          | -0.102 | -1.654  | 1.215  | -1.500     | 1.320      | 0.438      | 0.438 |   |
| <i>Lophura nycthemera</i>                                                  | altitude.sqrd | 0.199  | 0.255 | 0.003          | 0.201  | -0.318  | 0.684  | -0.325     | 0.675      | 0.787      | 0.213 |   |
| <i>Polyplectron bicalcaratum</i>                                           | altitude.sqrd | -3.980 | 2.685 | 0.119          | -3.505 | -10.679 | -0.287 | -9.183     | 0.184      | 0.008      | 0.008 | * |
| <i>Gallus gallus</i>                                                       | Log roughness | -0.432 | 0.465 | 0.023          | -0.437 | -1.319  | 0.500  | -1.317     | 0.501      | 0.174      | 0.174 |   |
| <i>Lophura nycthemera</i>                                                  | Log roughness | 0.536  | 0.227 | 0.002          | 0.538  | 0.085   | 0.973  | 0.089      | 0.975      | 0.990      | 0.010 | * |



|                                                                              |               |        |       |       |        |        |       |        |       |       |       |   |
|------------------------------------------------------------------------------|---------------|--------|-------|-------|--------|--------|-------|--------|-------|-------|-------|---|
| <i>Polyplectron bicalcaratum</i>                                             | Log roughness | 1.691  | 0.904 | 0.037 | 1.576  | 0.288  | 3.900 | 0.139  | 3.535 | 0.996 | 0.004 | * |
| <i>Gallus gallus</i>                                                         | Log tourism   | 2.263  | 1.810 | 0.171 | 1.726  | 0.222  | 7.209 | -0.077 | 6.457 | 0.996 | 0.004 | * |
| <i>Lophura nycthemera</i>                                                    | Log tourism   | 0.365  | 0.287 | 0.003 | 0.356  | -0.180 | 0.953 | -0.204 | 0.923 | 0.903 | 0.097 |   |
| <i>Polyplectron bicalcaratum</i>                                             | Log tourism   | 0.798  | 0.665 | 0.018 | 0.725  | -0.335 | 2.306 | -0.425 | 2.173 | 0.910 | 0.090 |   |
| Posterior predicted $\gamma$ coefficients for association with detectability |               |        |       |       |        |        |       |        |       |       |       |   |
| <i>Gallus gallus</i>                                                         | Ndvi          | 0.129  | 0.570 | 0.013 | 0.157  | -1.117 | 1.211 | -1.080 | 1.247 | 0.628 | 0.372 |   |
| <i>Lophura nycthemera</i>                                                    | Ndvi          | 0.285  | 0.287 | 0.003 | 0.288  | -0.284 | 0.842 | -0.257 | 0.861 | 0.842 | 0.158 |   |
| <i>Polyplectron bicalcaratum</i>                                             | Ndvi          | 0.613  | 0.631 | 0.008 | 0.507  | -0.416 | 2.128 | -0.579 | 1.914 | 0.865 | 0.135 |   |
| <i>Gallus gallus</i>                                                         | Northness     | -0.021 | 0.450 | 0.010 | -0.048 | -0.833 | 0.961 | -0.885 | 0.893 | 0.442 | 0.442 |   |
| <i>Lophura nycthemera</i>                                                    | Northness     | -0.176 | 0.224 | 0.002 | -0.169 | -0.630 | 0.249 | -0.626 | 0.250 | 0.215 | 0.215 |   |
| <i>Polyplectron bicalcaratum</i>                                             | Northness     | 0.224  | 0.453 | 0.008 | 0.172  | -0.540 | 1.218 | -0.566 | 1.177 | 0.661 | 0.339 |   |
| <i>Gallus gallus</i>                                                         | Eastness      | 0.009  | 0.579 | 0.011 | 0.012  | -1.187 | 1.179 | -1.225 | 1.134 | 0.509 | 0.491 |   |
| <i>Lophura nycthemera</i>                                                    | Eastness      | -0.083 | 0.332 | 0.004 | -0.067 | -0.770 | 0.551 | -0.765 | 0.554 | 0.412 | 0.412 |   |
| <i>Polyplectron bicalcaratum</i>                                             | Eastness      | 0.655  | 0.785 | 0.010 | 0.531  | -0.555 | 2.441 | -0.588 | 2.403 | 0.818 | 0.182 |   |

**Table S5:** Community coefficients of association of availability ( $\beta$  or mbeta) and individual detectability ( $\gamma$  or mpbeta) for three species of pheasants with 6 environmental covariates for 48 camera trap stations in the Namha National Protected Area. Means of coefficients of association ( $\widehat{\beta}_{oj}$  and  $\widehat{\gamma}_{oj}$ ), SD, Times Series Standard Error, 95% Bayesian Credible Interval (BCI), 95% Highest Probability Density Interval (HPDI) and Bayesian posterior predicted probability (Bppp) of greater or less than 0.0 from a Royle Nichols Hierarchical model of availability and detectability. Six covariates (eight coefficients) were included in the model, as in Table S4.

|                                                                                         |        |       |                |        | BCI    |        | 95% HPDI   |            |            |       |
|-----------------------------------------------------------------------------------------|--------|-------|----------------|--------|--------|--------|------------|------------|------------|-------|
| Covariate                                                                               | Mean   | SD    | Time-series SE | Median | 2.50%  | 97.50% | HPDI lower | HPDI upper | PPP of > 0 | Bppp  |
| Posterior predicted $\beta$ coefficients for association with availability              |        |       |                |        |        |        |            |            |            |       |
| Km to village                                                                           | 0.167  | 0.452 | 0.005          | 0.169  | -0.799 | 1.055  | -0.836     | 1.001      | 0.704      | 0.296 |
| Altitude                                                                                | -0.188 | 0.489 | 0.005          | -0.177 | -1.218 | 0.826  | -1.181     | 0.861      | 0.302      | 0.302 |
| altitude.sqrd                                                                           | -0.266 | 0.797 | 0.009          | -0.191 | -2.068 | 1.271  | -2.038     | 1.291      | 0.358      | 0.358 |
| Log roughness                                                                           | 0.233  | 0.650 | 0.007          | 0.222  | -1.157 | 1.580  | -1.062     | 1.647      | 0.678      | 0.322 |
| Log tourism                                                                             | 0.426  | 0.700 | 0.007          | 0.407  | -0.965 | 1.931  | -0.946     | 1.940      | 0.767      | 0.233 |
| Ndvi                                                                                    | 0.227  | 0.481 | 0.005          | 0.219  | -0.779 | 1.164  | -0.771     | 1.169      | 0.729      | 0.271 |
| Posterior predicted $\gamma$ coefficient for association with individual detectability: |        |       |                |        |        |        |            |            |            |       |
| Northness                                                                               | -0.004 | 0.411 | 0.005          | -0.019 | -0.798 | 0.877  | -0.802     | 0.872      | 0.471      | 0.471 |
| Eastness                                                                                | 0.093  | 0.503 | 0.005          | 0.070  | -0.904 | 1.179  | -0.911     | 1.168      | 0.580      | 0.420 |
